# Supplementary material for: Bimetallic gold core–silver shell nanorod performance for surface enhanced Raman spectroscopy
Source: Royal Society of Chemistry journal article supplement (doi:10.1039/c7ra06573f), 2017-01-01
Supplement: c7ra06573f1.pdf [file c7ra06573f1.pdf]

Supporting information for:

Bimetallic Gold Core - Silver Shell Nanorods Performance  
for Surface Enhanced Raman Spectroscopy

Zeid A. Nima,<sup>†</sup> Yevgeniy R. Davletshin,<sup>‡</sup> Fumiya Watanabe,<sup>†</sup> Karrer M.  
Alghazali,<sup>†</sup> J. Carl Kumaradas,<sup>‡</sup> and Alexandru S. Biris<sup>\*,†</sup>

<sup>†</sup>*Center for Integrative Nanotechnology Sciences, University of Arkansas at Little Rock, 2801  
S. University Ave., Little Rock, AR 72204, USA*

<sup>‡</sup>*Ryerson University, 350 Victoria Street, Toronto, ON M5B 2K3, Canada*

**1- XPS data<sup>S1</sup>**

A Thermo Scientific Model K-Alpha x-ray photoelectron spectroscopy (XPS) instrument (Thermo Scientific LLC, Madison, WI) using monochromatic Al K $\alpha$  radiation (1486.7 eV) generated XPS data for the assessment of the silver layer formation and chemical composition for four classes of AuNR/Ag. The spot sizes of x-ray used in this study were 200 or 400  $\mu$ m. The electrons emitted from the sample surfaces were analyzed with a 128 multi-channel hemispherical electron energy analyzer. The analyzer pass energies for survey spectra and high-resolution (narrow scan) spectra were set to 200 eV and 50 eV, respectively. The base vacuum pressure maintained in the analysis chamber was typically  $\sim 1 \times 10^{-9}$  mBar.

Several drops of the thiolated polyethylene glycol- (HS-PEG) coated samples were dried on glass microscope slides and mounted to the sample platen using copper clips. The food gun, utilizing a combination of low energy electrons and argon ions, was turned on for charge neutralization during all spectra collection, causing the vacuum in the analysis chamber to rise to  $\sim 2 \times 10^{-7}$  mBar during the measurements. The Thermo Scientific Avantage XPS software package<sup>®</sup> was used to collect and analyze all spectra. All spectra were charge-corrected by shifting the lowest energy C1s peak to the value of 284.8 eV, corresponding to C–C or C–H bonds confirmed by the pure metallic Au4f<sub>7/2</sub> peak at 84.0 eV. XPS peaks were fitted by mixed Gaussian/Lorentzian peaks after Shirley-Smart background subtraction. In our XPS studies, the binding energies of C1s, Au4f<sub>7/2</sub>, Ag3d<sub>5/2</sub>, O1s, N1s, and S2p<sub>3/2</sub>, were investigated.

XPS data analysis was conducted to analyze the surface chemical compositions of (0, 1, 2, 3,

and 4 nm) silver-coated gold nanorods. Table S1 and Figure S1 reveal that as the silver layer thickness increased, the atomic percentage amount of the silver increased. However, increasing the amount of silver on the outermost layer of the nanorods decreased the signal from the gold core gradually, which confirms the formation and thickness of the silver layer.

**Table S1:** XPS atomic percentage of elemental chemical composition of the gold nanorod (AuNR\Ag(0)) and four classes of silver-coated gold SERS substrates.

| Silver layer thickness (nm) | Ag atomic % (Ag3d <sub>5/2</sub> ) | Au atomic % (Au4f <sub>7/2</sub> ) |
|-----------------------------|------------------------------------|------------------------------------|
| AuNR\Ag(0)                  | 0                                  | 0.54                               |
| AuNR\Ag(1)                  | 2.63                               | 3.08                               |
| AuNR\Ag(2)                  | 2.61                               | 1.88                               |
| AuNR\Ag(3)                  | 3.94                               | 1                                  |
| AuNR\Ag(4)                  | 8.13                               | 0.42                               |

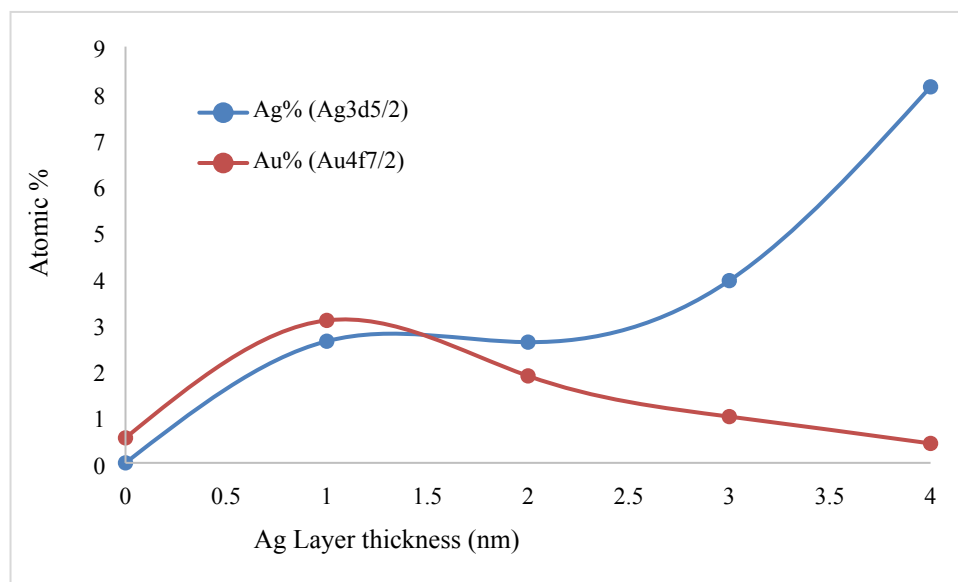

**Figure S1:** Atomic percentage of silver-coated gold nanorods.

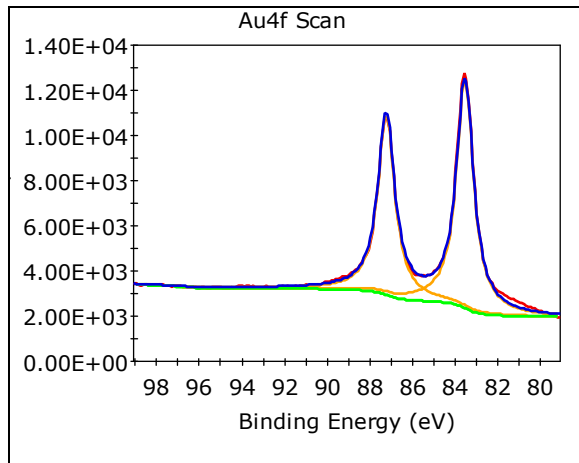

**Figure S2 and Figure S2:** AuNR\Ag(0) (Ag = 0 nm)

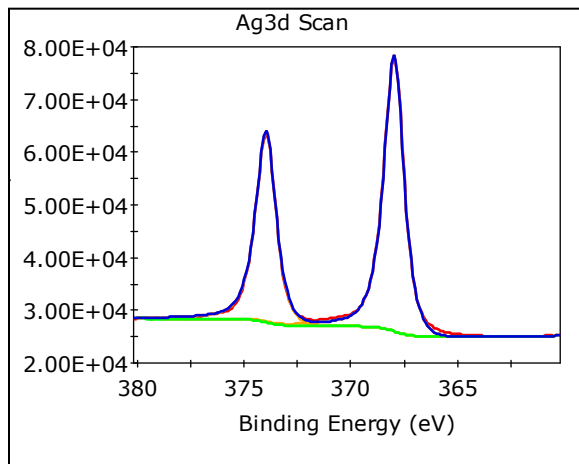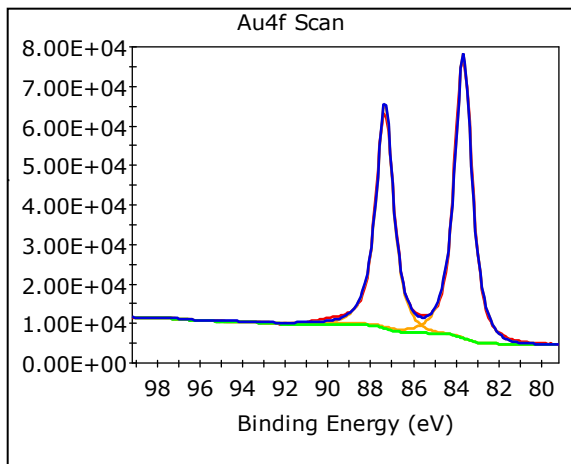

**Figure S3 and Figure S3:** AuNR\Ag(1) (Ag = 1 nm)

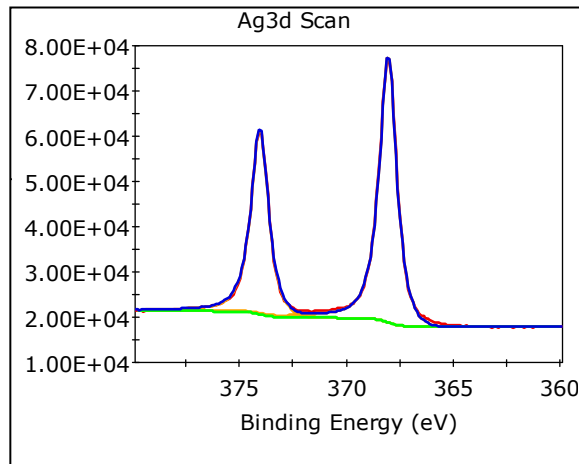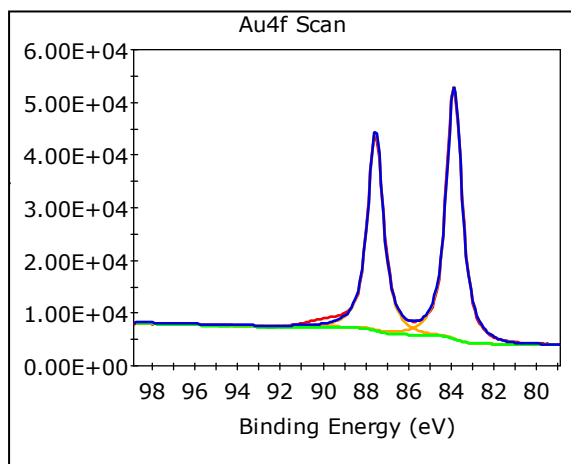

**Figure S4 and Figure S4:** AuNR\Ag(2) (Ag = 2 nm)

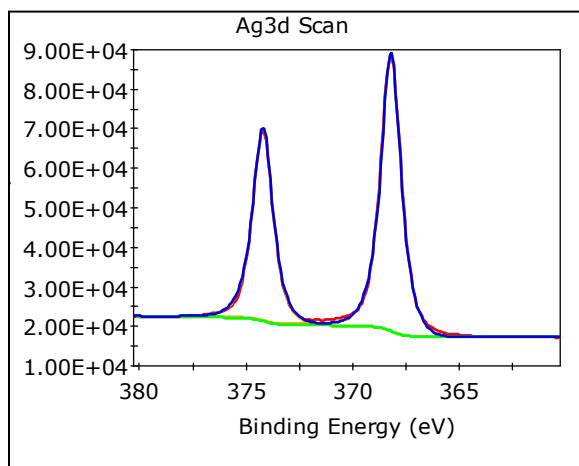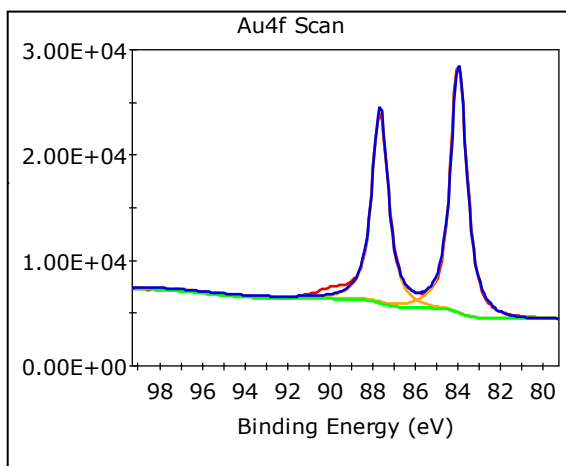

**Figure S5 and Figure S5:** AuNR\Ag(3) (Ag = 3 nm)

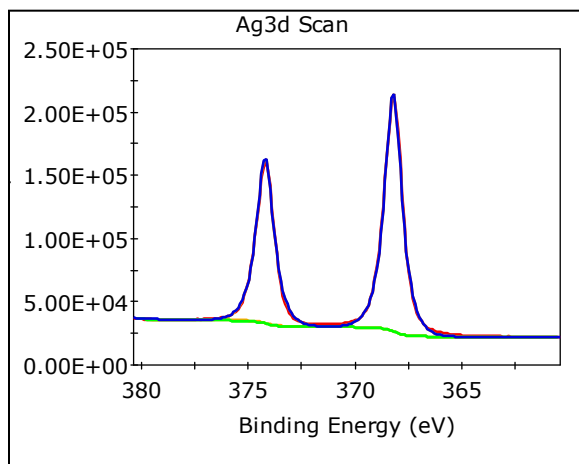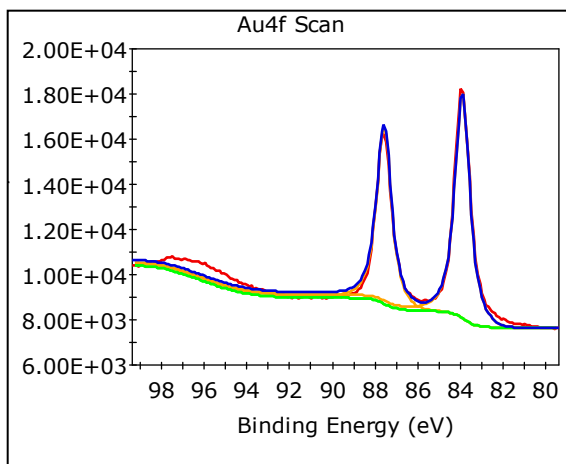

**Figure S6 and Figure S6:** AuNR\Ag(4) (Ag = 4 nm)

## 2- Zeta Potential

Zeta potential for the following samples were conducted using ZetaView®, from Electrophoresis and Brownian Motion Video Analysis Laser Scattering Microscopy.

**Table S2:** Zeta potential analysis of nanorods samples

| <b>Sample</b>   | <b>Zeta Potential (mV)</b> | <b>Number of traced particles</b> |
|-----------------|----------------------------|-----------------------------------|
| AuNR-Ag(0)      | -44.69                     | 552                               |
| AuNR-Ag(1)      | 43.55                      | 676                               |
| AuNR-Ag(2)      | 40.59                      | 661                               |
| AuNR-Ag(3)      | 32.28                      | 446                               |
| AuNR-Ag(3)      | 45.94                      | 418                               |
| AuNR-Ag(2)-PATP | -28.76                     | 312                               |

Following images are the analysis report for each kind:

# 1) AuNR-Ag(0)



**ZETAVIEW**  
LASER DOPPLER VELOCITY MEASUREMENT



**PARTICLE METRIX**  
www.particle-metrix.de

**Electrophoresis & Brownian Motion  
Video Analysis  
Laser Scattering Microscopy**

---

**Operator (Report): ZetaView**  
Video Operator: ZetaView

---

**Sample Parameters**  
 Sample Name: \AuNRx1000  
 \AuNR  
 Comment: sen 89, shutter 40, calib 325000  
 Electrolyte: PBS, Concentration: 135.000 N  
 Temperature: 27.01 °C sensed  
 pH 7.4 entered  
 Conductivity: 37.81 µS/cm sensed

**Measurement Parameters**  
 Cell S/N: CA0020\_0062b  
 Sensed Electric Field: 4.18 V/cm  
**Measurement Mode: Stationary 4 Cycles**

**Result**  
 Mobility: -3.78 FWHM 1.72 µm/sec/V/cm, @ 25°C: -3.65 µm/sec/V/cm  
 ZP Factor 12.4 (Smoluchowski):  
 Zeta Potential @ 25 °C: -46.72 FWHM 12.58 mV  
 Concentration 31.75E+6 Particles / mL

**Quality**  
 Number of Traced Particles: 552  
 ΔSL: 20.02 mV

**Analysis Parameters**  
 Max Size: 702, Min Size: 20, Min Brightness: 30

---



Frequency vs Zeta Potential / mV. Peak at approximately -44.7 mV.



Frequency vs Zeta Potential / mV. Peak at approximately -44.7 mV.

---

| Stationary Layers | Rel. Position |
|-------------------|---------------|
| SL1               | 0.149         |
| SL2               | 0.851         |

  

**Peak Analysis (25 °C)**

| Zeta Potential / mV | Frequency | FWHM / mV | Percentage |
|---------------------|-----------|-----------|------------|
| -44.6920            | 25.3960   | 22.0154   | 100.0000   |



---

**Comment**

(Signature)

---

Analyzed Video: C:\Users\ZetaView\Documents\LabVIEW Data\Test\20150911\_0023\_AuNRx1000\_SL.avi

ZetaVIEW S/N 201, Software ZetaView 8.02.28, Camera 0.703 µm/px

Experiment: 2015-09-11 13:46, Report: 2015-09-11 13:48

## 2) AuNR-Ag(1)

|                                                                                                                                                                                                                                                                                                                                                                                                                                                                                                                              |                                                                                                                                                                         | <p>Electrophoresis &amp; Brownian Motion<br/>Video Analysis<br/>Laser Scattering Microscopy</p> |            |       |     |       |                     |           |           |            |         |         |         |          |                                                                                      |  |
|---------------------------------------------------------------------------------------------------------------------------------------------------------------------------------------------------------------------------------------------------------------------------------------------------------------------------------------------------------------------------------------------------------------------------------------------------------------------------------------------------------------------------------------------------------------------------------------------------------------|----------------------------------------------------------------------------------------------------------------------------------------------------------------------------------------------------------------------------------------------------------|-------------------------------------------------------------------------------------------------|------------|-------|-----|-------|---------------------|-----------|-----------|------------|---------|---------|---------|----------|--------------------------------------------------------------------------------------|--|
| <p><b>Operator (Report): ZetaView</b><br/>Video Operator: ZetaView</p>                                                                                                                                                                                                                                                                                                                                                                                                                                                                                                                                        |                                                                                                                                                                                                                                                          |                                                                                                 |            |       |     |       |                     |           |           |            |         |         |         |          |                                                                                      |  |
| <p><b>Sample Parameters</b><br/>         Sample Name: \AuNR-PEG<br/>         \AuNR-Ag-1<br/>         Comment: sen 89, shutter 40, calib 325000<br/>         Electrolyte: PBS, Concentration: 135.000 N<br/>         Temperature: 26.94 °C sensed<br/>         pH 7.4 entered<br/>         Conductivity: 28.00 µS/cm sensed</p>                                                                                                                                                                                                                                                                                | <p><b>Result</b><br/>         Mobility: 3.30 FWHM 1.46 µm/sec/V/cm, @ 25°C: 3.18 µm/sec/V/cm<br/>         ZP Factor 12.4 (Smoluchowski):<br/>         Zeta Potential @ 25 °C: 40.79 FWHM 12.34 mV<br/>         Concentration 30.49E+6 Particles / mL</p> |                                                                                                 |            |       |     |       |                     |           |           |            |         |         |         |          |                                                                                      |  |
| <p><b>Measurement Parameters</b><br/>         Cell S/N: CA0020_0062b<br/>         Sensed Electric Field: 3.77 V/cm<br/> <b>Measurement Mode: Stationary 4 Cycles</b></p>                                                                                                                                                                                                                                                                                                                                                                                                                                      | <p><b>Quality</b><br/>         Number of Traced Particles: 676<br/>         ΔSL: 11.74 mV</p>                                                                                                                                                            | <p><b>Analysis Parameters</b><br/>         Max Size: 702, Min Size: 20, Min Brightness: 30</p>  |            |       |     |       |                     |           |           |            |         |         |         |          |                                                                                      |  |
|                                                                                                                                                                                                                                                                                                                                                                                                                                                                                                                             |                                                                                                                                                                       |                                                                                                 |            |       |     |       |                     |           |           |            |         |         |         |          |                                                                                      |  |
| <p><b>Stationary Layers</b></p> <table border="1" style="width: 100%; border-collapse: collapse;"> <thead> <tr> <th>SL</th> <th>Rel. Position</th> </tr> </thead> <tbody> <tr> <td>SL1</td> <td>0.149</td> </tr> <tr> <td>SL2</td> <td>0.851</td> </tr> </tbody> </table> <p><b>Peak Analysis (25 °C)</b></p> <table border="1" style="width: 100%; border-collapse: collapse;"> <thead> <tr> <th>Zeta Potential / mV</th> <th>Frequency</th> <th>FWHM / mV</th> <th>Percentage</th> </tr> </thead> <tbody> <tr> <td>43.5469</td> <td>36.2333</td> <td>18.6463</td> <td>100.0000</td> </tr> </tbody> </table> | SL                                                                                                                                                                                                                                                       | Rel. Position                                                                                   | SL1        | 0.149 | SL2 | 0.851 | Zeta Potential / mV | Frequency | FWHM / mV | Percentage | 43.5469 | 36.2333 | 18.6463 | 100.0000 |  |  |
| SL                                                                                                                                                                                                                                                                                                                                                                                                                                                                                                                                                                                                            | Rel. Position                                                                                                                                                                                                                                            |                                                                                                 |            |       |     |       |                     |           |           |            |         |         |         |          |                                                                                      |  |
| SL1                                                                                                                                                                                                                                                                                                                                                                                                                                                                                                                                                                                                           | 0.149                                                                                                                                                                                                                                                    |                                                                                                 |            |       |     |       |                     |           |           |            |         |         |         |          |                                                                                      |  |
| SL2                                                                                                                                                                                                                                                                                                                                                                                                                                                                                                                                                                                                           | 0.851                                                                                                                                                                                                                                                    |                                                                                                 |            |       |     |       |                     |           |           |            |         |         |         |          |                                                                                      |  |
| Zeta Potential / mV                                                                                                                                                                                                                                                                                                                                                                                                                                                                                                                                                                                           | Frequency                                                                                                                                                                                                                                                | FWHM / mV                                                                                       | Percentage |       |     |       |                     |           |           |            |         |         |         |          |                                                                                      |  |
| 43.5469                                                                                                                                                                                                                                                                                                                                                                                                                                                                                                                                                                                                       | 36.2333                                                                                                                                                                                                                                                  | 18.6463                                                                                         | 100.0000   |       |     |       |                     |           |           |            |         |         |         |          |                                                                                      |  |
| <p><b>Comment</b></p> <div style="border: 1px solid black; height: 20px; width: 100%;"></div>                                                                                                                                                                                                                                                                                                                                                                                                                                                                                                                 |                                                                                                                                                                                                                                                          |                                                                                                 |            |       |     |       |                     |           |           |            |         |         |         |          |                                                                                      |  |
| <p>(Signature)</p>                                                                                                                                                                                                                                                                                                                                                                                                                                                                                                                                                                                            |                                                                                                                                                                                                                                                          |                                                                                                 |            |       |     |       |                     |           |           |            |         |         |         |          |                                                                                      |  |
| <p>Analyzed Video: C:\Users\Zeta View\Documents\LabVIEW Data\Test20150911_0029_AuNR-Ag-1_SL.a.vi</p>                                                                                                                                                                                                                                                                                                                                                                                                                                                                                                          |                                                                                                                                                                                                                                                          |                                                                                                 |            |       |     |       |                     |           |           |            |         |         |         |          |                                                                                      |  |
| <p>ZetaVIEW S/N 201, Software ZetaView 8.02.28, Camera 0.703 µm/px</p>                                                                                                                                                                                                                                                                                                                                                                                                                                                                                                                                        |                                                                                                                                                                                                                                                          |                                                                                                 |            |       |     |       |                     |           |           |            |         |         |         |          |                                                                                      |  |
| <p>Experiment: 2015-09-11 14:26, Report: 2015-09-11 14:28</p>                                                                                                                                                                                                                                                                                                                                                                                                                                                                                                                                                 |                                                                                                                                                                                                                                                          |                                                                                                 |            |       |     |       |                     |           |           |            |         |         |         |          |                                                                                      |  |

### 3) AuNR-Ag(2)

| <br><small>LASER SCATTERING YOUR MICROSCOPE</small>                                                                                                                                                                                                                                                                                                                                                                                                                                                     | <br><b>PARTICLEMETRIX</b><br><small>www.particle-metrix.de</small>                                                       | <b>Electrophoresis &amp; Brownian Motion<br/>Video Analysis<br/>Laser Scattering Microscopy</b> |            |       |     |       |                     |           |           |            |         |         |         |          |                                                                                      |
|------------------------------------------------------------------------------------------------------------------------------------------------------------------------------------------------------------------------------------------------------------------------------------------------------------------------------------------------------------------------------------------------------------------------------------------------------------------------------------------------------------------------------------------------------------------------------------------|-----------------------------------------------------------------------------------------------------------------------------------------------------------------------------------------------------------|-------------------------------------------------------------------------------------------------|------------|-------|-----|-------|---------------------|-----------|-----------|------------|---------|---------|---------|----------|--------------------------------------------------------------------------------------|
| <b>Operator (Report): ZetaView</b><br>Video Operator: ZetaView                                                                                                                                                                                                                                                                                                                                                                                                                                                                                                                           |                                                                                                                                                                                                           |                                                                                                 |            |       |     |       |                     |           |           |            |         |         |         |          |                                                                                      |
| <b>Sample Parameters</b><br>Sample Name: \\AuNR-PEG<br>\\AuNR-Ag-2<br>Comment: sen 89, shutter 40, calib 325000<br>Electrolyte: PBS, Concentration: 135.000 N<br>Temperature: 26.45 °C sensed<br>pH 7.4 entered<br>Conductivity: 21.21 µS/cm sensed                                                                                                                                                                                                                                                                                                                                      | <b>Result</b><br>Mobility: 3.00 FWHM 1.52 µm/sec/V/cm, @ 25°C: 2.92 µm/sec/V/cm<br>ZP Factor 12.5 (Smoluchowski):<br>Zeta Potential @ 25 °C: 37.47 FWHM 12.59 mV<br>Concentration 33.72E+6 Particles / mL |                                                                                                 |            |       |     |       |                     |           |           |            |         |         |         |          |                                                                                      |
| <b>Measurement Parameters</b><br>Cell S/N: CA0020_0062b<br>Sensed Electric Field: 3.71 V/cm<br><b>Measurement Mode: Stationary 4 Cycles</b>                                                                                                                                                                                                                                                                                                                                                                                                                                              | <b>Quality</b><br>Number of Traced Particles: 661<br>ΔSL: 7.59 mV                                                                                                                                         |                                                                                                 |            |       |     |       |                     |           |           |            |         |         |         |          |                                                                                      |
|                                                                                                                                                                                                                                                                                                                                                                                                                                                                                                                                                                                          |                                                                                                                                                                                                           | <b>Analysis Parameters</b><br>Max Size: 702, Min Size: 20, Min Brightness: 30                   |            |       |     |       |                     |           |           |            |         |         |         |          |                                                                                      |
|  <p>Frequency vs Zeta Potential / mV</p>                                                                                                                                                                                                                                                                                                                                                                                                                                                               |  <p>Frequency vs Zeta Potential / mV</p>                                                                               |                                                                                                 |            |       |     |       |                     |           |           |            |         |         |         |          |                                                                                      |
| <table border="1" style="width: 100%; border-collapse: collapse;"> <thead> <tr> <th>Stationary Layers</th> <th>Rel. Position</th> </tr> </thead> <tbody> <tr> <td>SL1</td> <td>0.149</td> </tr> <tr> <td>SL2</td> <td>0.851</td> </tr> </tbody> </table><br><b>Peak Analysis (25 °C)</b> <table border="1" style="width: 100%; border-collapse: collapse;"> <thead> <tr> <th>Zeta Potential / mV</th> <th>Frequency</th> <th>FWHM / mV</th> <th>Percentage</th> </tr> </thead> <tbody> <tr> <td>40.5931</td> <td>34.9956</td> <td>19.4297</td> <td>100.0000</td> </tr> </tbody> </table> | Stationary Layers                                                                                                                                                                                         | Rel. Position                                                                                   | SL1        | 0.149 | SL2 | 0.851 | Zeta Potential / mV | Frequency | FWHM / mV | Percentage | 40.5931 | 34.9956 | 19.4297 | 100.0000 |  |
| Stationary Layers                                                                                                                                                                                                                                                                                                                                                                                                                                                                                                                                                                        | Rel. Position                                                                                                                                                                                             |                                                                                                 |            |       |     |       |                     |           |           |            |         |         |         |          |                                                                                      |
| SL1                                                                                                                                                                                                                                                                                                                                                                                                                                                                                                                                                                                      | 0.149                                                                                                                                                                                                     |                                                                                                 |            |       |     |       |                     |           |           |            |         |         |         |          |                                                                                      |
| SL2                                                                                                                                                                                                                                                                                                                                                                                                                                                                                                                                                                                      | 0.851                                                                                                                                                                                                     |                                                                                                 |            |       |     |       |                     |           |           |            |         |         |         |          |                                                                                      |
| Zeta Potential / mV                                                                                                                                                                                                                                                                                                                                                                                                                                                                                                                                                                      | Frequency                                                                                                                                                                                                 | FWHM / mV                                                                                       | Percentage |       |     |       |                     |           |           |            |         |         |         |          |                                                                                      |
| 40.5931                                                                                                                                                                                                                                                                                                                                                                                                                                                                                                                                                                                  | 34.9956                                                                                                                                                                                                   | 19.4297                                                                                         | 100.0000   |       |     |       |                     |           |           |            |         |         |         |          |                                                                                      |
| <b>Comment</b><br><div style="border: 1px solid black; height: 20px; width: 100%; margin-top: 5px;"></div>                                                                                                                                                                                                                                                                                                                                                                                                                                                                               |                                                                                                                                                                                                           |                                                                                                 |            |       |     |       |                     |           |           |            |         |         |         |          |                                                                                      |
| <small>(Signature)</small>                                                                                                                                                                                                                                                                                                                                                                                                                                                                                                                                                               |                                                                                                                                                                                                           |                                                                                                 |            |       |     |       |                     |           |           |            |         |         |         |          |                                                                                      |
| <small>Analyzed Video: C:\Users\ZetaView\Documents\LabVIEW Data\Test\20150911_0034_AuNR-Ag-2_SL.avi</small>                                                                                                                                                                                                                                                                                                                                                                                                                                                                              |                                                                                                                                                                                                           |                                                                                                 |            |       |     |       |                     |           |           |            |         |         |         |          |                                                                                      |
| <small>Zeta View S/N 201, Software Zeta View 8.02.28, Camera 0.703 µm/px</small>                                                                                                                                                                                                                                                                                                                                                                                                                                                                                                         |                                                                                                                                                                                                           |                                                                                                 |            |       |     |       |                     |           |           |            |         |         |         |          |                                                                                      |
| <small>Experiment: 2015-09-11 14:54, Report: 2015-09-11 14:56</small>                                                                                                                                                                                                                                                                                                                                                                                                                                                                                                                    |                                                                                                                                                                                                           |                                                                                                 |            |       |     |       |                     |           |           |            |         |         |         |          |                                                                                      |



# 4) AuNR-Ag(3)



**PARTICLEMETRIX**  
www.particle-metrix.de

Electrophoresis & Brownian Motion  
Video Analysis  
Laser Scattering Microscopy

---

**Operator (Report): ZetaView**  
Video Operator: ZetaView

**Sample Parameters**  
 Sample Name: W AuNR-PEG  
 W AuNR-Ag-3  
 Comment: sen 89, shutter 40, calib 325000  
 Electrolyte: PBS, Concentration: 135.000 N  
 Temperature: 26.63 °C sensed  
 pH 7.4 entered  
 Conductivity: 25.91 µS/cm sensed

**Measurement Parameters**  
 Cell S/N: CA0020\_0062b  
 Sensed Electric Field: 3.61 V/cm  
**Measurement Mode: Stationary 4 Cycles**

**Result**  
 Mobility: 2.46 FWHM 1.77 µm/sec/V/cm, @ 25 °C: 2.39 µm/sec/V/cm  
 ZP Factor 12.4 (Smoluchowski):  
 Zeta Potential @ 25 °C: 30.59 FWHM 12.15 mV  
 Concentration 17.59E+6 Particles / mL

**Quality**  
 Number of Traced Particles: 446  
 ΔSL: 2.90 mV

**Analysis Parameters**  
 Max Size: 702, Min Size: 20, Min Brightness: 30





| Stationary Layers | Rel. Position |
|-------------------|---------------|
| SL1               | 0.149         |
| SL2               | 0.851         |

  

| Peak Analysis (25 °C) |           |           |            |
|-----------------------|-----------|-----------|------------|
| Zeta Potential / mV   | Frequency | FWHM / mV | Percentage |
| 32.2763               | 20.9706   | 22.7290   | 100.0000   |



**Comment**

(Signature)

---

Analyzed Video: C:\Users\ZetaView\Documents\LabVIEW Data\Test\20150911\_0030\_AuNR-Ag-3\_SL.avi

ZetaVIEW S/N 201, Software Zeta View 8.02.28, Camera 0.703 µm/px

Experiment: 2015-09-11 14:36, Report: 2015-09-11 14:38

# 5) AuNR-Ag(4)



**PARTICLEMETRIX**  
www.particle-metrix.de

Electrophoresis & Brownian Motion  
Video Analysis  
Laser Scattering Microscopy

---

**Operator (Report): ZetaView**  
Video Operator: ZetaView

---

**Sample Parameters**  
 Sample Name: \\AuNR-PEG  
 \\AuNR-Ag-4  
 Comment: sen 89, shutter 40, calib 325000  
 Electrolyte: PBS, Concentration: 135.000 N  
 Temperature: 26.72 °C sensed  
 pH 7.4 entered  
 Conductivity: 19.77 µS/cm sensed

**Measurement Parameters**  
 Cell S/N: CA0020\_0062b  
 Sensed Electric Field: 3.78 V/cm  
**Measurement Mode: Stationary 4 Cycles**

**Result**  
 Mobility: 3.57 FWHM 1.46 µm/sec/V/cm, @ 25°C: 3.47 µm/sec/V/cm  
 ZP Factor 12.4 (Smoluchowski):  
 Zeta Potential @ 25 °C: 44.39 FWHM 11.50 mV  
 Concentration 19.68E+6 Partides / mL

**Quality**  
 Number of Traced Partides: 418  
 ΔSL: 11.18 mV

**Analysis Parameters**  
 Max Size: 702, Min Size: 20, Min Brightness: 30

---



Frequency vs Zeta Potential / mV. Peak at ~45 mV.



Frequency vs Zeta Potential / mV. Peak at ~45 mV.

---

| Stationary Layers | Rel. Position |
|-------------------|---------------|
| SL1               | 0.149         |
| SL2               | 0.851         |

**Peak Analysis (25 °C)**

| Zeta Potential / mV | Frequency | FWHM / mV | Percentage |
|---------------------|-----------|-----------|------------|
| 45.9442             | 23.4303   | 18.6435   | 100.0000   |



---

Comment

(Signature)

---

Analyzed Video: C:\Users\ZetaView\Documents\LabVIEW Data\Test\20150911\_0087\_AuNR-Ag-4\_SL.a.vi

ZetaVIEW S/N 201, Software Zeta View 8.02.28, Camera 0.703 µm/px

Experiment: 2015-09-11 15:07, Report: 2015-09-11 15:08

## 6) AuNR-Ag(2)-PATP

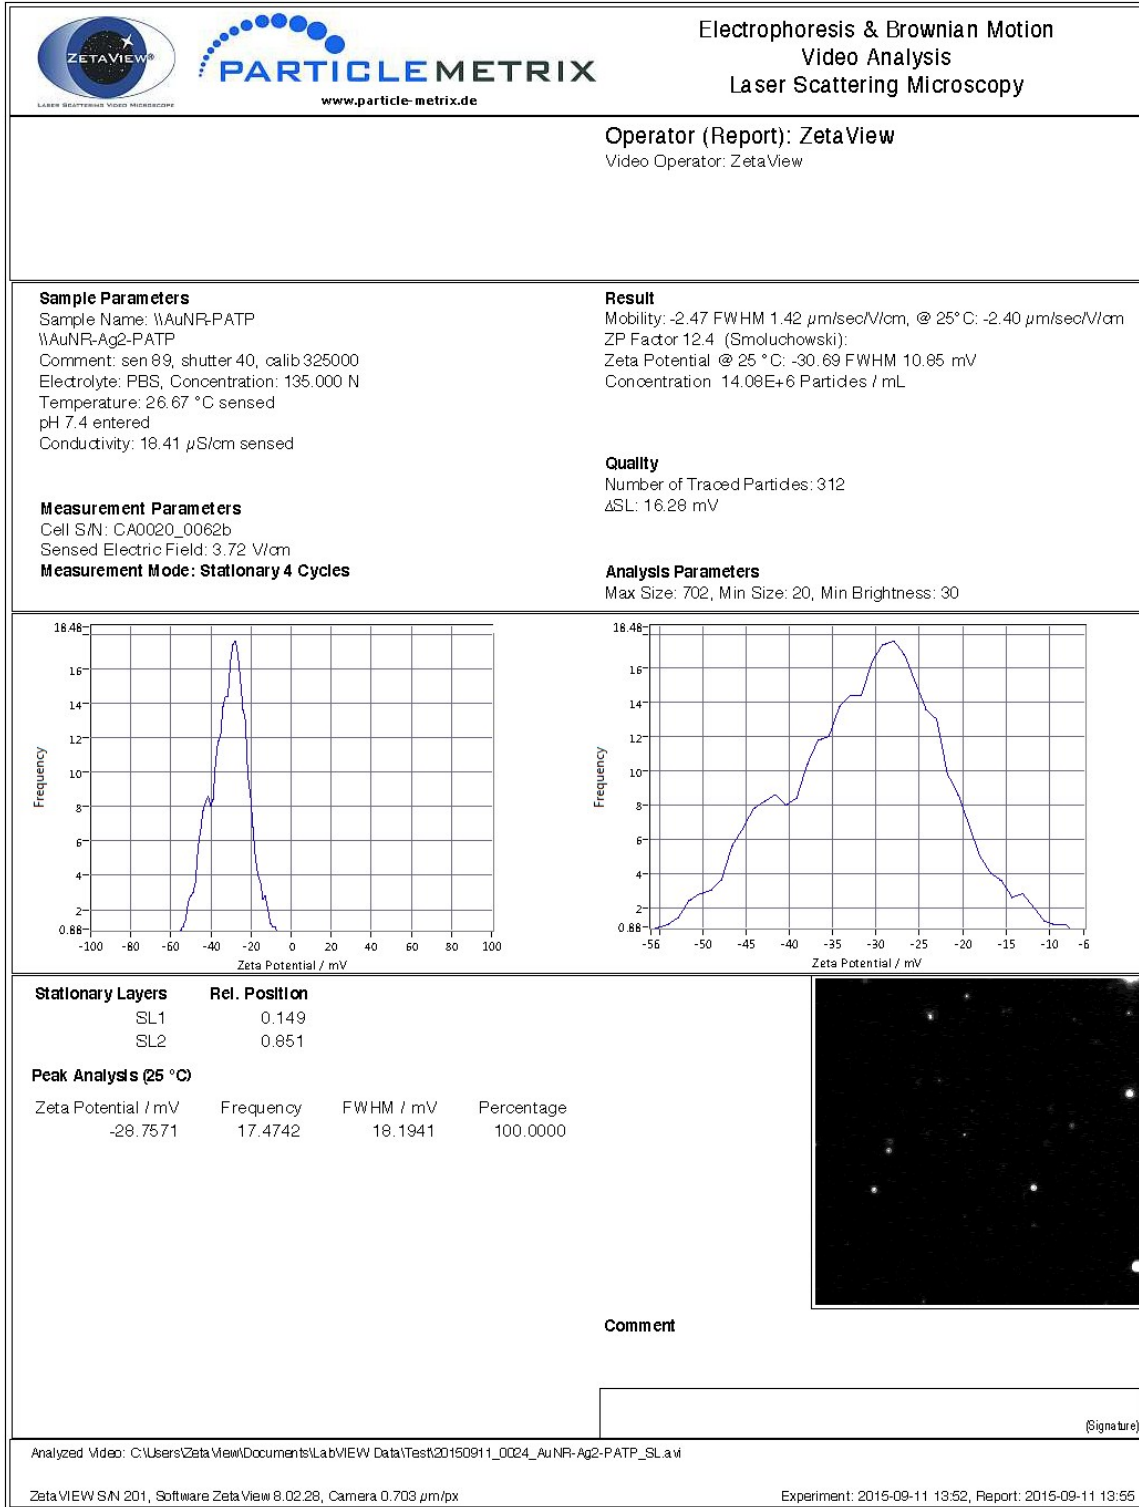

### 3- TEM images

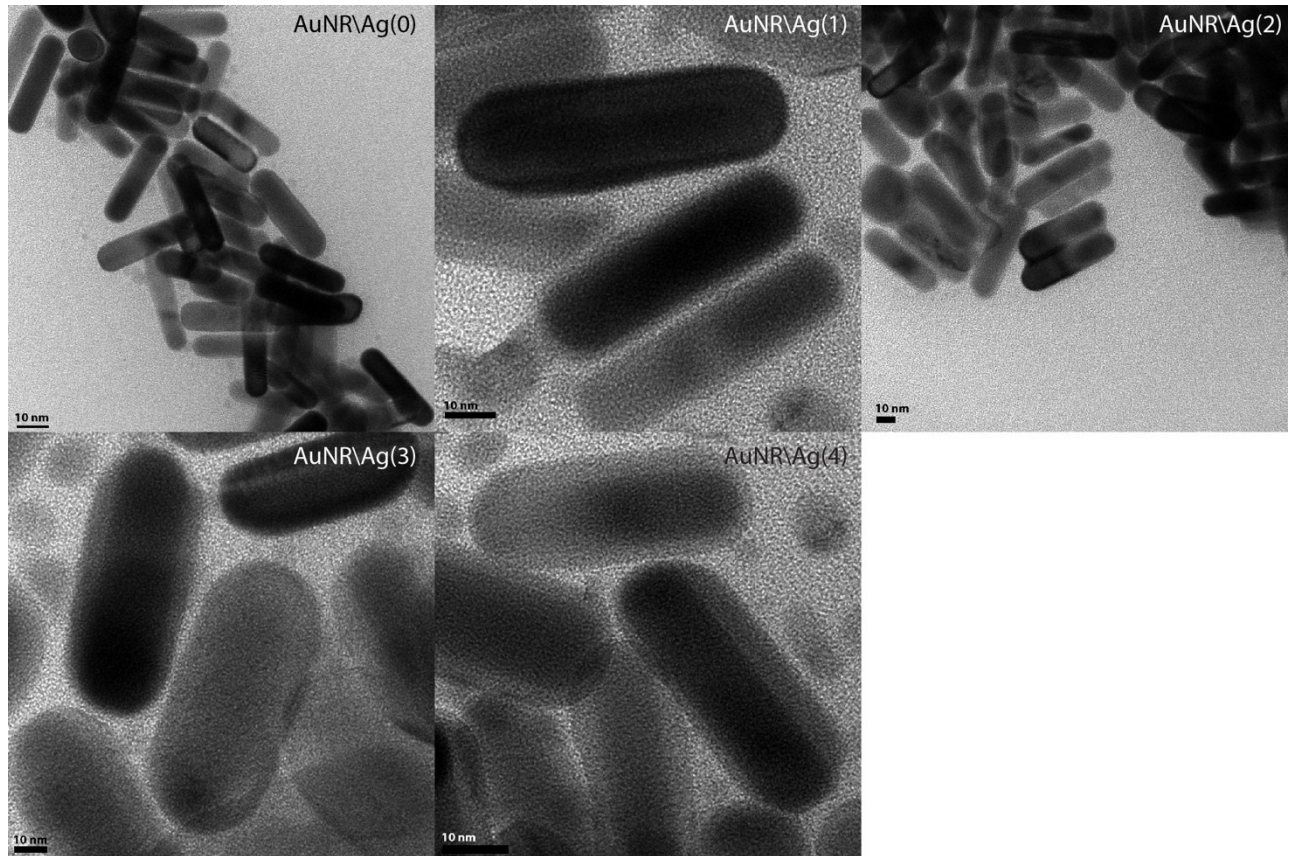

### 4- SERS experimental error bars

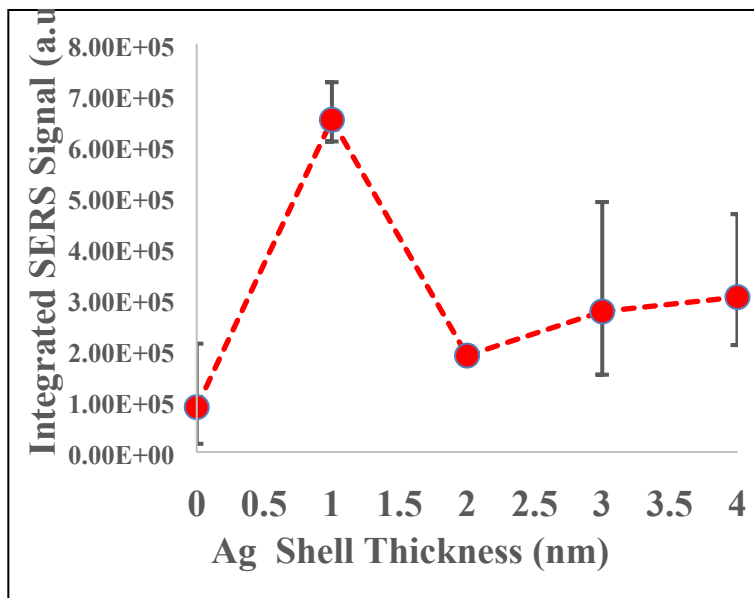

## 5- STEM images

AuNR\Ag(1)

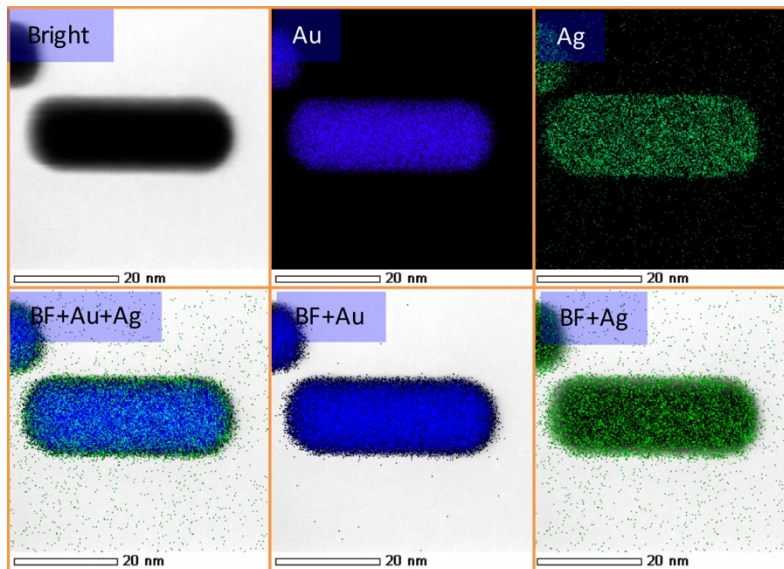

AuNR\Ag(2)

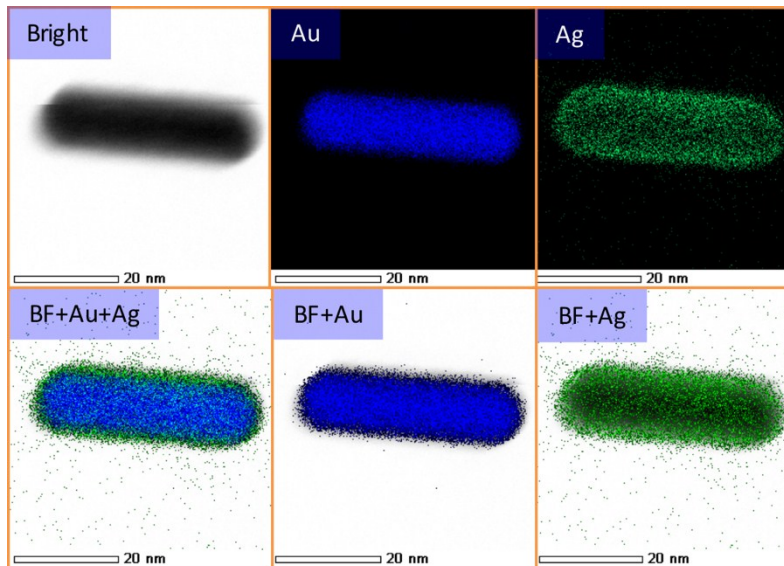

AuNR\Ag(3)

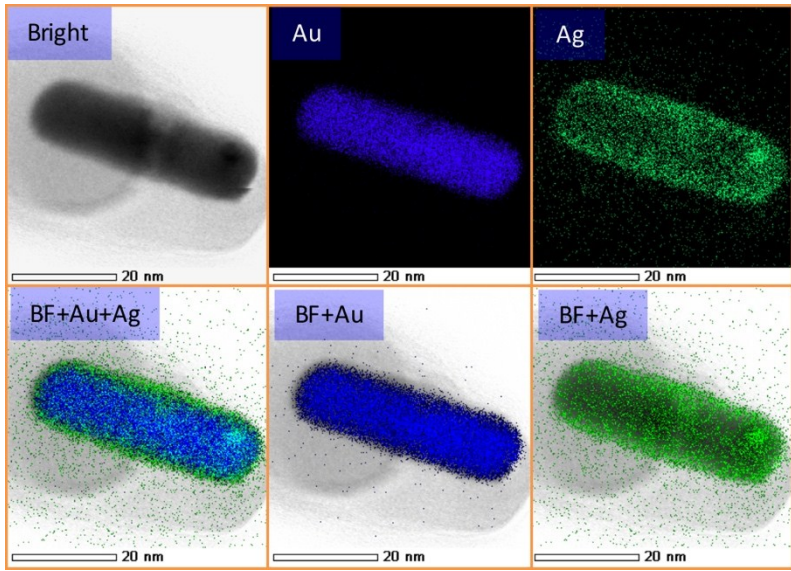

AuNR\Ag(4)

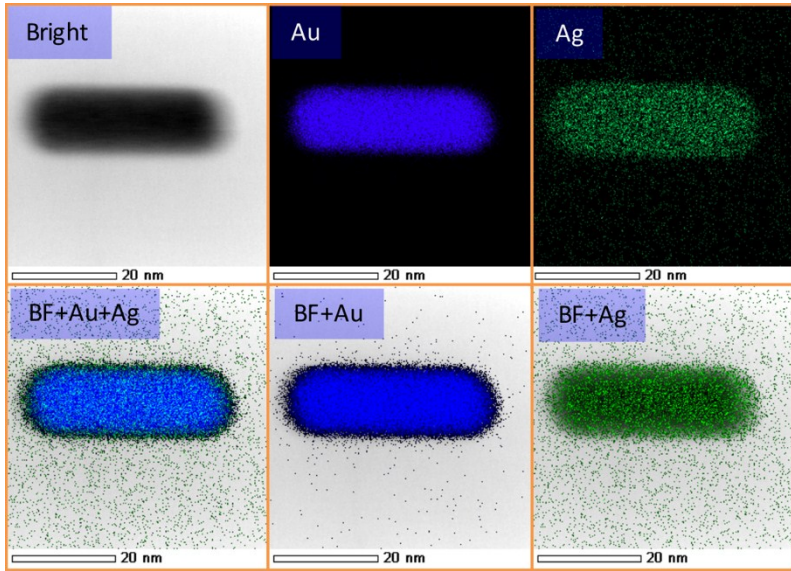

## References

(S1): Fumiya, W.; Zeid, A. N.; Takumi, H.; Masatoshi, M.; Minoru, N.; Alexandru, S. B. X-ray photoelectron spectroscopy and transmission electron microscopy analysis of silver-coated gold nanorods designed for bionanotechnology applications. *Nanotechnology* 2017, 28 (2), 025704.
